# Supplementary material
Source: PubMed Central journal article supplement (PMC3190018)
Supplement: NIHMS321562-supplement-01.pdf [file NIHMS321562-supplement-01.pdf]

**Supplemental Online Table 1. Individual studies on the feeding patterns of four species of *Culex* mosquitoes. All these studies determined the fraction of blood meals that came from mammals and birds (and usually from other vertebrate classes), and all determined the fraction that had fed on humans. To ensure consistency in calculating the fraction of bloodmeals from humans, we only included bloodmeals that were conclusively identified.**

| Species             | State, unless outside USA | N     | N <sub>human</sub> | N <sub>mammal</sub> | N <sub>bird</sub> | Human/<br>mammal<br>fraction | Fraction<br>mammal | Fraction<br>human | Fraction<br>bird | Reference                     |  |
|---------------------|---------------------------|-------|--------------------|---------------------|-------------------|------------------------------|--------------------|-------------------|------------------|-------------------------------|--|
| <i>Cx. tarsalis</i> | Utah                      | 800   | 5                  | 446                 | 354               | 0.01                         | 0.56               | 0.006             | 0.44             | (Andersen et al., 1967)       |  |
|                     | California                | 247   | 5                  | 119                 | 124               | 0.04                         | 0.48               | 0.020             | 0.50             | (Gunstream et al., 1971)      |  |
|                     | Texas                     | 3495  | 0                  | 1100                | 2394              | 0                            | 0.31               | 0                 | 0.69             | (Hayes et al., 1973)          |  |
|                     | California                | 11585 | 5                  | 1922                | 9663              | 0.00                         | 0.17               | 0.0004            | 0.83             | (Tempelis et al., 1965)       |  |
|                     | Colorado                  | 3423  | 1                  | 1363                | 2058              | 0.00                         | 0.40               | 0.0003            | 0.60             | (Tempelis et al., 1967)       |  |
|                     | Colorado                  | 243   | 0                  | 66                  | 177               | 0                            | 0.27               | 0                 | 0.73             | (Tempelis et al., 1967)       |  |
|                     | California                | 951   | 0                  | 394                 | 556               | 0                            | 0.41               | 0                 | 0.59             | (Tempelis and Washino, 1967)  |  |
|                     | California                | 939   | 16                 | 269                 | 670               | 0.06                         | 0.29               | 0.017             | 0.71             | (Wekesa et al., 1997)         |  |
|                     | California                | 102   | 0                  | 17                  | 85                | 0                            | 0.17               | 0                 | 0.83             | (Reisen et al., 1992)         |  |
|                     | Colorado                  | 363   | 14                 | 62                  | 301               | 0.23                         | 0.17               | 0.039             | 0.83             | (Kent et al., 2009)           |  |
|                     | Total/Average             | 22148 |                    |                     |                   |                              | 0.03               | 0.32              | 0.008            | 0.68                          |  |
|                     | SD                        |       |                    |                     |                   |                              | 0.08               | 0.10              | 0.014            | 0.10                          |  |
| <i>Cx. pipiens</i>  | Colorado                  | 682   | 1                  | 21                  | 661               | 0.05                         | 0.03               | 0.0015            | 0.97             | (Tempelis et al., 1967)       |  |
|                     | New York                  | 73    | 0                  | 1                   | 70                | 0                            | 0.01               | 0                 | 0.96             | (Apperson et al., 2002)       |  |
|                     | New Jersey                | 75    | 4                  | 37                  | 23                | 0.11                         | 0.49               | 0.053             | 0.31             | (Apperson et al., 2004)       |  |
|                     | Connecticut               | 212   | 1                  | 13                  | 198               | 0.08                         | 0.06               | 0.005             | 0.93             | (Molaei et al., 2006)         |  |
|                     | Tennessee                 | 55    | 0                  | 10                  | 45                | 0                            | 0.18               | 0                 | 0.82             | (Savage et al., 2007)         |  |
|                     | Maryland, DC              | 156   | 14                 | 21                  | 135               | 0.67                         | 0.13               | 0.090             | 0.87             | (Kilpatrick et al., 2006a)    |  |
|                     | Illinois                  | 246   | 44                 | 55                  | 191               | 0.80                         | 0.22               | 0.179             | 0.78             | (Hamer et al., 2008)          |  |
|                     | Total/Average             | 1499  | 64                 | 158                 | 1323              | 0.24                         | 0.16               | 0.047             | 0.80             |                               |  |
| SD                  |                           |       |                    |                     |                   | 0.36                         | 0.17               | 0.071             | 0.24             |                               |  |
| <i>Cx. restuans</i> | New York                  | 23    | 0                  | 3                   | 20                | 0                            | 0.13               | 0                 | 0.87             | (Apperson et al., 2002)       |  |
|                     | New Jersey                | 14    | 1                  | 7                   | 7                 | 0.14                         | 0.50               | 0.071             | 0.50             | (Apperson et al., 2004)       |  |
|                     | Maryland, DC              | 14    | 3                  | 3                   | 11                | 1                            | 0.21               | 0.214             | 0.79             | Kilpatrick et al. unpub. data |  |
|                     | Connecticut               | 18    | 0                  | 0                   | 18                | 0                            | 0                  | 0                 | 1                | (Magnarelli, 1977)            |  |

1  
2  
3  
4  
5  
6  
7  
8  
9  
10  
11  
12  
13  
14  
15  
16  
17  
18  
19  
20  
21  
22  
23  
24  
25  
26  
27  
28  
29  
30  
31  
32  
33  
34  
35  
36  
37  
38  
39  
40  
41  
42  
43  
44  
45  
46  
47  
48  
49

|                         |                 |      |    |     |      |      |      |       |      |                             |
|-------------------------|-----------------|------|----|-----|------|------|------|-------|------|-----------------------------|
|                         | Connecticut     | 30   | 0  | 0   | 30   | 0    | 0    | 0     | 1    | (Molaei et al., 2006)       |
|                         | Tennessee       | 437  | 3  | 102 | 274  | 0.03 | 0.23 | 0.007 | 0.63 | (Savage et al., 2007)       |
|                         | Illinois        | 35   | 6  | 8   | 27   | 0.75 | 0.23 | 0.171 | 0.77 | (Hamer et al., 2008)        |
|                         | Total/Average   | 571  | 13 | 123 | 387  | 0.27 | 0.19 | 0.066 | 0.79 |                             |
|                         | SD              |      |    |     |      | 0.42 | 0.13 | 0.097 | 0.19 |                             |
| <i>Cx.</i>              |                 |      |    |     |      |      |      |       |      |                             |
| <i>quinquefasciatus</i> | Louisiana       | 686  | 48 | 274 | 412  | 0.18 | 0.40 | 0.070 | 0.60 | (Mackay et al., 2010)       |
|                         | Texas           | 728  | 3  | 409 | 319  | 0.01 | 0.56 | 0.004 | 0.44 | (Molaei et al., 2007)       |
|                         | Mississippi     | 945  | 3  | 286 | 659  | 0.01 | 0.30 | 0.003 | 0.70 | (Bertsch and Norment, 1983) |
|                         | Yucatan, Mexico | 240  | 16 | 43  | 197  | 0.37 | 0.18 | 0.067 | 0.82 | (Garcia-Rejon et al., 2010) |
|                         | E. Australia    | 171  | 6  | 17  | 154  | 0.35 | 0.10 | 0.035 | 0.90 | (Jansen et al., 2009)       |
|                         | W. Australia    | 37   | 2  | 15  | 22   | 0.13 | 0.41 | 0.054 | 0.59 | (Johansen et al., 2009)     |
|                         | California      | 424  | 8  | 49  | 375  | 0.16 | 0.12 | 0.019 | 0.88 | (Molaei et al., 2010)       |
|                         | California      | 521  | 3  | 195 | 326  | 0.02 | 0.37 | 0.006 | 0.63 | (Reisen et al., 1992)       |
|                         | Tennessee       | 115  | 1  | 17  | 91   | 0.06 | 0.15 | 0.009 | 0.79 | (Savage et al., 2007)       |
|                         | Total/Average   | 3867 | 26 | 622 | 1824 | 0.14 | 0.29 | 0.030 | 0.71 |                             |
|                         | SD              |      |    |     |      | 0.16 | 0.16 | 0.028 | 0.15 |                             |
